# Supplementary material
Source: MDPI journal article supplement (https://www.mdpi.com/2071-1050/14/17/11056)
Supplement: s1 [file s1]

## Supplementary tables and figures

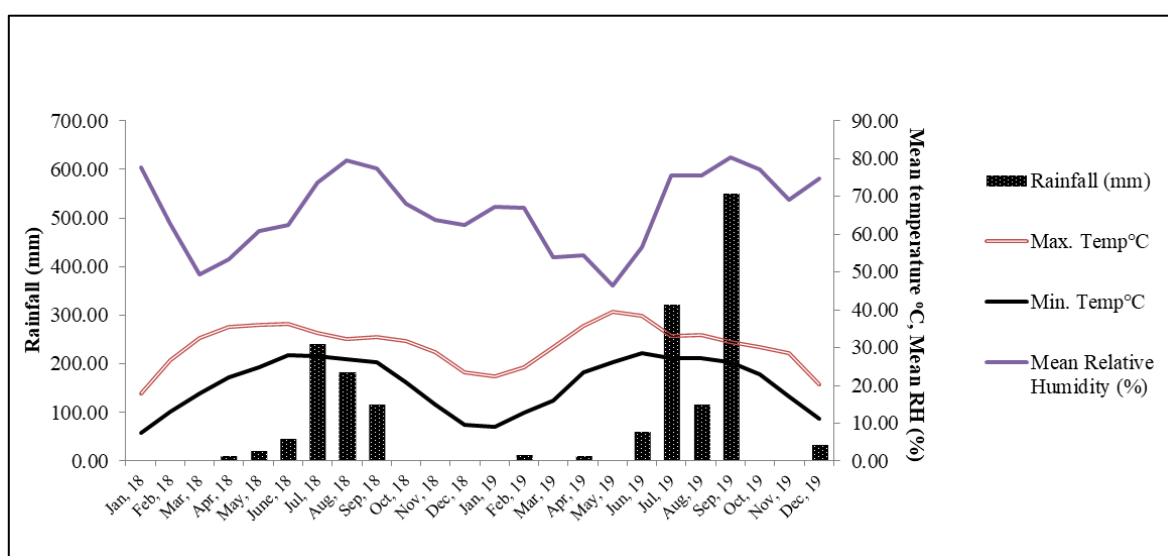

**Figure S1.** Mean monthly meteorological observations during 2018 and 2019.

**Supplementary Table S1** Treatment description of the present experiment.

| Treatment abbreviation                                                 | Descriptions                                                                                                                                                                                                    |
|------------------------------------------------------------------------|-----------------------------------------------------------------------------------------------------------------------------------------------------------------------------------------------------------------|
| ZTDSR <sub>R+</sub> : Zero-tillage direct-seeded rice with residue     | Direct seeded rice in zero-tillage with 30% rice residue retention sown at 22.5 cm row spacing by happy seeder. All the pre-established weeds were controlled by pre-sowing application of glyphosate (41% EC). |
| ZTDSR: Zero-tillage direct-seeded rice                                 | Same as above except residue retention.                                                                                                                                                                         |
| CTDSR <sub>R+</sub> : Conventional-till transplanted rice with residue | Conventional tillage (2 dry harrowing + 2 wet tillage + 1 planking) direct seeded rice. 30% rice residues were kept in fields.                                                                                  |
| CTDSR: Conventional-till transplanted rice                             | Same as CTDSR <sub>R+</sub> except residue retention.                                                                                                                                                           |
| PTR <sub>R+</sub> : Puddled transplanted rice with residue             | Conventional rice transplanting with a row spacing of 20 cm and hill to hill spacing of 15 cm. 30% rice residues incorporated in plots.                                                                         |
| PTR: Puddled transplanted rice                                         | Same as PTR <sub>R+</sub> except residue retention.                                                                                                                                                             |
| R+: Residue retention (30%)                                            |                                                                                                                                                                                                                 |

**WSA % (>2 mm) 0-15cm**

| Type 3 Tests of Fixed Effects |        |        |         |        |
|-------------------------------|--------|--------|---------|--------|
| Effect                        | Num DF | Den DF | F Value | Pr > F |
| Tillage                       | 5      | 10     | 5.67    | 0.0098 |
| Crop rotation                 | 4      | 48     | 5.20    | 0.0015 |
| Tillage*Crop rotation         | 20     | 48     | 6.87    | <.0001 |

| Type 3 Tests of Fixed Effects |        |        |         |        |
|-------------------------------|--------|--------|---------|--------|
| Effect                        | Num DF | Den DF | F Value | Pr > F |
| Crop rotation                 | 4      | 60     | 1.78    | 0.1457 |
| block                         | 2      | 10     | 1.89    | 0.2016 |
| Crop rotation*block           | 8      | 60     | 0.41    | 0.9100 |

| Source              | DF | Sum of Squares | F Value | Pr > F |
|---------------------|----|----------------|---------|--------|
| Crop rotation       | 4  | 79.363284      | 1.78    | 0.1457 |
| block               | 2  | 20.328602      | 1.89    | 0.2016 |
| Crop rotation*block | 8  | 36.737909      | 0.41    | 0.9100 |
| Tillage             | 5  | 152.657822     | 5.67    | 0.0098 |
| Tillage*block       | 10 | 53.840264      | 0.48    | 0.8955 |
| Residual            | 60 | 670.652847     | .       | .      |

**WSA % (2-0.5mm) 0-15 cm**

| Type 3 Tests of Fixed Effects |        |        |         |        |
|-------------------------------|--------|--------|---------|--------|
| Effect                        | Num DF | Den DF | F Value | Pr > F |
| Tillage                       | 5      | 10     | 4.99    | 0.0150 |
| Crop rotation                 | 4      | 48     | 6.77    | 0.0002 |
| Tillage*Crop rotation         | 20     | 48     | 1.71    | 0.0647 |

| Type 3 Tests of Fixed Effects |        |        |         |        |
|-------------------------------|--------|--------|---------|--------|
| Effect                        | Num DF | Den DF | F Value | Pr > F |
| Crop rotation                 | 4      | 60     | 5.69    | 0.0006 |
| block                         | 2      | 10     | 1.21    | 0.3392 |
| Crop rotation*block           | 8      | 60     | 1.15    | 0.3431 |

| Source              | DF | Sum of Squares | F Value | Pr > F |
|---------------------|----|----------------|---------|--------|
| Crop rotation       | 4  | 1891.843536    | 5.69    | 0.0006 |
| block               | 2  | 287.216900     | 1.21    | 0.3392 |
| Crop rotation*block | 8  | 765.400835     | 1.15    | 0.3431 |
| Tillage             | 5  | 2967.389455    | 4.99    | 0.0150 |
| Tillage*block       | 10 | 1189.830919    | 1.43    | 0.1884 |
| Residual            | 60 | 4983.568060    | .       | .      |

**WSA % (0.5-0.25 mm) 0-15 cm**

| Type 3 Tests of Fixed Effects |        |        |         |        |
|-------------------------------|--------|--------|---------|--------|
| Effect                        | Num DF | Den DF | F Value | Pr > F |
| Tillage                       | 5      | 10     | 4.04    | 0.0287 |
| Crop rotation                 | 4      | 48     | 6.08    | 0.0005 |
| Tillage*Crop rotation         | 20     | 48     | 3.83    | <.0001 |

| Type 3 Tests of Fixed Effects |        |        |         |        |
|-------------------------------|--------|--------|---------|--------|
| Effect                        | Num DF | Den DF | F Value | Pr > F |
| Crop rotation                 | 4      | 60     | 3.31    | 0.0163 |
| block                         | 2      | 10     | 0.30    | 0.7488 |
| Crop rotation*block           | 8      | 60     | 0.96    | 0.4730 |

| Source              | DF | Sum of Squares | F Value | Pr > F |
|---------------------|----|----------------|---------|--------|
| Crop rotation       | 4  | 829.067239     | 3.31    | 0.0163 |
| block               | 2  | 41.604649      | 0.30    | 0.7488 |
| Crop rotation*block | 8  | 483.110940     | 0.96    | 0.4730 |
| Tillage             | 5  | 1247.075954    | 3.57    | 0.0411 |
| Tillage*block       | 10 | 698.622293     | 1.11    | 0.3666 |
| Residual            | 60 | 3760.911423    | .       | .      |

WSA%

0.25-0.125mm 0-15 cm

| Type 3 Tests of Fixed Effects |        |        |         |        |
|-------------------------------|--------|--------|---------|--------|
| Effect                        | Num DF | Den DF | F Value | Pr > F |
| Tillage                       | 5      | 10     | 2.92    | 0.0700 |
| Crop rotation                 | 4      | 48     | 17.58   | <.0001 |
| Tillage*Crop rotation         | 20     | 48     | 13.46   | <.0001 |

| Type 3 Tests of Fixed Effects |        |        |         |        |
|-------------------------------|--------|--------|---------|--------|
| Effect                        | Num DF | Den DF | F Value | Pr > F |
| Crop rotation                 | 4      | 60     | 3.37    | 0.0149 |
| block                         | 2      | 10     | 6.21    | 0.0177 |
| Crop rotation*block           | 8      | 60     | 0.19    | 0.9915 |

| Source              | DF | Sum of Squares | F Value | Pr > F |
|---------------------|----|----------------|---------|--------|
| Crop rotation       | 4  | 713.765869     | 3.37    | 0.0149 |
| block               | 2  | 77.161508      | 6.21    | 0.0177 |
| Crop rotation*block | 8  | 80.176699      | 0.19    | 0.9915 |
| Tillage             | 5  | 148.434104     | 4.78    | 0.0172 |
| Tillage*block       | 10 | 62.157941      | 0.12    | 0.9995 |
| Residual            | 60 | 3178.820917    | .       | .      |

WSA%

0.125-0.053mm (0-15cm)

| Type 3 Tests of Fixed Effects |        |        |         |        |
|-------------------------------|--------|--------|---------|--------|
| Effect                        | Num DF | Den DF | F Value | Pr > F |
| Tillage                       | 5      | 10     | 0.94    | 0.4933 |
| Crop rotation                 | 4      | 48     | 2.14    | 0.0897 |
| Tillage*Crop rotation         | 20     | 48     | 2.36    | 0.0077 |

| Type 3 Tests of Fixed Effects |        |        |         |        |
|-------------------------------|--------|--------|---------|--------|
| Effect                        | Num DF | Den DF | F Value | Pr > F |
| Crop rotation                 | 4      | 60     | 1.74    | 0.1532 |
| block                         | 2      | 10     | 4.66    | 0.0372 |
| Crop rotation*block           | 8      | 60     | 2.62    | 0.0158 |

| Source              | DF | Sum of Squares | F Value | Pr > F |
|---------------------|----|----------------|---------|--------|
| Crop rotation       | 4  | 38.606606      | 1.74    | 0.1532 |
| block               | 2  | 22.851541      | 4.66    | 0.0372 |
| Crop rotation*block | 8  | 116.188262     | 2.62    | 0.0158 |
| Tillage             | 5  | 21.264183      | 1.73    | 0.2144 |
| Tillage*block       | 10 | 24.522670      | 0.44    | 0.9196 |

| Source   | DF | Sum of Squares | F Value | Pr > F |
|----------|----|----------------|---------|--------|
| Residual | 60 | 332.933852     | .       | .      |

**WSA % >2mm (15-30cm)**

| Type 3 Tests of Fixed Effects |        |        |         |        |
|-------------------------------|--------|--------|---------|--------|
| Effect                        | Num DF | Den DF | F Value | Pr > F |
| Tillage                       | 5      | 10     | 6.45    | 0.0063 |
| Crop rotation                 | 4      | 48     | 2.56    | 0.0505 |
| Tillage*Crop rotation         | 20     | 48     | 1.49    | 0.1301 |

| Type 3 Tests of Fixed Effects |        |        |         |        |
|-------------------------------|--------|--------|---------|--------|
| Effect                        | Num DF | Den DF | F Value | Pr > F |
| Crop rotation                 | 4      | 60     | 2.05    | 0.0994 |
| block                         | 2      | 10     | 0.54    | 0.5964 |
| Crop rotation*block           | 8      | 60     | 0.81    | 0.5950 |

| Source              | DF | Sum of Squares | F Value | Pr > F |
|---------------------|----|----------------|---------|--------|
| Crop rotation       | 4  | 12.765170      | 2.05    | 0.0994 |
| block               | 2  | 0.809721       | 0.54    | 0.5964 |
| Crop rotation*block | 8  | 10.134266      | 0.81    | 0.5950 |
| Tillage             | 5  | 40.244934      | 10.82   | 0.0009 |
| Tillage*block       | 10 | 7.436612       | 0.48    | 0.8987 |
| Residual            | 60 | 93.629515      | .       | .      |

**WSA% 2-0.5mm (15-30 cm)**

| Type 3 Tests of Fixed Effects |        |        |         |        |
|-------------------------------|--------|--------|---------|--------|
| Effect                        | Num DF | Den DF | F Value | Pr > F |
| Tillage                       | 5      | 10     | 0.21    | 0.9519 |
| Crop rotation                 | 4      | 48     | 1.54    | 0.2066 |
| Tillage*Crop rotation         | 20     | 48     | 1.69    | 0.0698 |

| Type 3 Tests of Fixed Effects |        |        |         |        |
|-------------------------------|--------|--------|---------|--------|
| Effect                        | Num DF | Den DF | F Value | Pr > F |
| Crop rotation                 | 4      | 60     | 1.20    | 0.3215 |
| block                         | 2      | 10     | 6.19    | 0.0178 |
| Crop rotation*block           | 8      | 60     | 0.46    | 0.8769 |

| Source              | DF | Sum of Squares | F Value | Pr > F |
|---------------------|----|----------------|---------|--------|
| Crop rotation       | 4  | 281.466370     | 1.20    | 0.3215 |
| block               | 2  | 740.799480     | 6.19    | 0.0178 |
| Crop rotation*block | 8  | 217.941635     | 0.46    | 0.8769 |
| Tillage             | 5  | 61.918459      | 0.21    | 0.9519 |
| Tillage*block       | 10 | 597.911013     | 1.02    | 0.4402 |
| Residual            | 60 | 3527.161253    | .       | .      |

**WSA % 0.5-0.25mm (15-30cm)**

| Type 3 Tests of Fixed Effects |        |        |         |        |
|-------------------------------|--------|--------|---------|--------|
| Effect                        | Num DF | Den DF | F Value | Pr > F |
| Tillage                       | 5      | 10     | 4.07    | 0.0281 |
| Crop rotation                 | 4      | 48     | 0.77    | 0.5498 |
| Tillage*Crop rotation         | 20     | 48     | 6.03    | <.0001 |

| Type 3 Tests of Fixed Effects |        |        |         |        |
|-------------------------------|--------|--------|---------|--------|
| Effect                        | Num DF | Den DF | F Value | Pr > F |
| Crop rotation                 | 4      | 60     | 0.29    | 0.8839 |
| block                         | 2      | 10     | 48.22   | <.0001 |
| Crop rotation*block           | 8      | 60     | 0.46    | 0.8762 |

| Source              | DF | Sum of Squares | F Value | Pr > F |
|---------------------|----|----------------|---------|--------|
| Crop rotation       | 4  | 68.338373      | 0.29    | 0.8839 |
| block               | 2  | 1866.998088    | 48.22   | <.0001 |
| Crop rotation*block | 8  | 219.618483     | 0.46    | 0.8762 |
| Tillage             | 5  | 451.501649     | 4.66    | 0.0186 |
| Tillage*block       | 10 | 193.598353     | 0.33    | 0.9704 |
| Residual            | 60 | 3545.512106    | .       | .      |

**WSA% 0.25-0.125mm (15-30 cm)**

| Type 3 Tests of Fixed Effects |        |        |         |        |
|-------------------------------|--------|--------|---------|--------|
| Effect                        | Num DF | Den DF | F Value | Pr > F |
| Tillage                       | 5      | 10     | 11.68   | 0.0006 |
| Crop rotation                 | 4      | 48     | 8.08    | <.0001 |
| Tillage*Crop rotation         | 20     | 48     | 5.36    | <.0001 |

| Type 3 Tests of Fixed Effects |        |        |         |        |
|-------------------------------|--------|--------|---------|--------|
| Effect                        | Num DF | Den DF | F Value | Pr > F |
| Crop rotation                 | 4      | 60     | 3.23    | 0.0181 |
| block                         | 2      | 10     | 4.33    | 0.0441 |
| Crop rotation*block           | 8      | 60     | 0.37    | 0.9341 |



| Source              | DF | Sum of Squares | F Value | Pr > F |
|---------------------|----|----------------|---------|--------|
| Crop rotation       | 4  | 648.360596     | 3.23    | 0.0181 |
| block               | 2  | 138.005381     | 4.33    | 0.0441 |
| Crop rotation*block | 8  | 147.063796     | 0.37    | 0.9341 |
| Tillage             | 5  | 1171.295578    | 14.71   | 0.0002 |
| Tillage*block       | 10 | 159.255734     | 0.32    | 0.9735 |
| Residual            | 60 | 3008.382645    | .       | .      |

**WSA % 0.125-0.053mm (15-30 cm)**

| Type 3 Tests of Fixed Effects |        |        |         |        |
|-------------------------------|--------|--------|---------|--------|
| Effect                        | Num DF | Den DF | F Value | Pr > F |
| Tillage                       | 5      | 10     | 3.69    | 0.0374 |
| Crop rotation                 | 4      | 48     | 0.70    | 0.5948 |
| Tillage*Crop rotation         | 20     | 48     | 1.96    | 0.0295 |

| Type 3 Tests of Fixed Effects |        |        |         |        |
|-------------------------------|--------|--------|---------|--------|
| Effect                        | Num DF | Den DF | F Value | Pr > F |
| Crop rotation                 | 4      | 60     | 0.50    | 0.7328 |
| block                         | 2      | 10     | 2.26    | 0.1550 |
| Crop rotation*block           | 8      | 60     | 0.65    | 0.7365 |

| Source              | DF | Sum of Squares | F Value | Pr > F |
|---------------------|----|----------------|---------|--------|
| Crop rotation       | 4  | 39.252698      | 0.50    | 0.7328 |
| block               | 2  | 40.732314      | 2.26    | 0.1550 |
| Crop rotation*block | 8  | 100.486180     | 0.65    | 0.7365 |
| Tillage             | 5  | 258.401681     | 5.73    | 0.0094 |
| Tillage*block       | 10 | 90.122701      | 0.46    | 0.9072 |
| Residual            | 60 | 1167.782973    | .       | .      |

**MWD 0-15 cm**

| Type 3 Tests of Fixed Effects |        |        |         |        |
|-------------------------------|--------|--------|---------|--------|
| Effect                        | Num DF | Den DF | F Value | Pr > F |
| Tillage                       | 5      | 10     | 3.83    | 0.0336 |
| Crop rotation                 | 4      | 48     | 16.38   | <.0001 |
| Tillage*Crop rotation         | 20     | 48     | 7.81    | <.0001 |

| Type 3 Tests of Fixed Effects |        |        |         |        |
|-------------------------------|--------|--------|---------|--------|
| Effect                        | Num DF | Den DF | F Value | Pr > F |
| Crop rotation                 | 4      | 60     | 5.25    | 0.0011 |
| block                         | 2      | 10     | 6.60    | 0.0149 |
| Crop rotation*block           | 8      | 60     | 0.74    | 0.6595 |

| Source              | DF | Sum of Squares | F Value | Pr > F |
|---------------------|----|----------------|---------|--------|
| Crop rotation       | 4  | 0.473003       | 5.25    | 0.0011 |
| block               | 2  | 0.082060       | 6.60    | 0.0149 |
| Crop rotation*block | 8  | 0.132651       | 0.74    | 0.6595 |
| Tillage             | 5  | 0.138432       | 4.45    | 0.0215 |
| Tillage*block       | 10 | 0.062203       | 0.28    | 0.9842 |
| Residual            | 60 | 1.352111       | .       | .      |

**E(LT) 0-15cm**

| Type 3 Tests of Fixed Effects |        |        |         |        |
|-------------------------------|--------|--------|---------|--------|
| Effect                        | Num DF | Den DF | F Value | Pr > F |
| Tillage                       | 5      | 10     | 8.76    | 0.0020 |
| Crop rotation                 | 4      | 48     | 1.07    | 0.3838 |
| Tillage*Crop rotation         | 20     | 48     | 2.11    | 0.0179 |

| Type 3 Tests of Fixed Effects |        |        |         |        |
|-------------------------------|--------|--------|---------|--------|
| Effect                        | Num DF | Den DF | F Value | Pr > F |
| Crop rotation                 | 4      | 60     | 0.74    | 0.5705 |
| block                         | 2      | 10     | 1.26    | 0.3263 |
| Crop rotation*block           | 8      | 60     | 0.29    | 0.9662 |

| Source        | DF | Sum of Squares | F Value | Pr > F |
|---------------|----|----------------|---------|--------|
| Crop rotation | 4  | 310.201664     | 0.74    | 0.5705 |

| Source              | DF | Sum of Squares | F Value | Pr > F |
|---------------------|----|----------------|---------|--------|
| block               | 2  | 421.965626     | 1.26    | 0.3263 |
| Crop rotation*block | 8  | 245.444185     | 0.29    | 0.9662 |
| Tillage             | 5  | 7360.041606    | 8.76    | 0.0020 |
| Tillage*block       | 10 | 1680.591000    | 1.60    | 0.1295 |
| Residual            | 60 | 6314.000593    | .       | .      |

**MWD 15-30 cm**

| Type 3 Tests of Fixed Effects |        |        |         |        |
|-------------------------------|--------|--------|---------|--------|
| Effect                        | Num DF | Den DF | F Value | Pr > F |
| Tillage                       | 5      | 10     | 1.68    | 0.2273 |
| Crop rotation                 | 4      | 48     | 6.09    | 0.0005 |
| Tillage*Crop rotation         | 20     | 48     | 3.99    | <.0001 |

| Type 3 Tests of Fixed Effects |        |        |         |        |
|-------------------------------|--------|--------|---------|--------|
| Effect                        | Num DF | Den DF | F Value | Pr > F |
| Crop rotation                 | 4      | 60     | 2.92    | 0.0282 |
| block                         | 2      | 10     | 0.39    | 0.6886 |
| Crop rotation*block           | 8      | 60     | 0.16    | 0.9951 |

| Source              | DF | Sum of Squares | F Value | Pr > F |
|---------------------|----|----------------|---------|--------|
| Crop rotation       | 4  | 0.096740       | 2.92    | 0.0282 |
| block               | 2  | 0.003961       | 0.39    | 0.6886 |
| Crop rotation*block | 8  | 0.010682       | 0.16    | 0.9951 |
| Tillage             | 5  | 0.038497       | 1.51    | 0.2716 |
| Tillage*block       | 10 | 0.051128       | 0.62    | 0.7926 |
| Residual            | 60 | 0.496428       | .       | .      |

**GMD 15-30cm**

| Type 3 Tests of Fixed Effects |        |        |         |        |
|-------------------------------|--------|--------|---------|--------|
| Effect                        | Num DF | Den DF | F Value | Pr > F |
| Tillage                       | 5      | 10     | 3.70    | 0.0373 |
| Crop rotation                 | 4      | 48     | 5.59    | 0.0009 |
| Tillage*Crop rotation         | 20     | 48     | 4.64    | <.0001 |

| Type 3 Tests of Fixed Effects |        |        |         |        |
|-------------------------------|--------|--------|---------|--------|
| Effect                        | Num DF | Den DF | F Value | Pr > F |
| Crop rotation                 | 4      | 60     | 2.51    | 0.0510 |
| block                         | 2      | 10     | 1.82    | 0.2113 |
| Crop rotation*block           | 8      | 60     | 0.40    | 0.9142 |

| Source              | DF | Sum of Squares | F Value | Pr > F |
|---------------------|----|----------------|---------|--------|
| Crop rotation       | 4  | 0.025062       | 2.51    | 0.0510 |
| block               | 2  | 0.007152       | 1.82    | 0.2113 |
| Crop rotation*block | 8  | 0.008052       | 0.40    | 0.9142 |
| Tillage             | 5  | 0.036247       | 3.70    | 0.0373 |
| Tillage*block       | 10 | 0.019614       | 0.79    | 0.6416 |
| Residual            | 60 | 0.149646       | .       | .      |

**E(LT) 15-30cm**

| Type 3 Tests of Fixed Effects |        |        |         |        |
|-------------------------------|--------|--------|---------|--------|
| Effect                        | Num DF | Den DF | F Value | Pr > F |
| Tillage                       | 5      | 10     | 12.02   | 0.0006 |
| Crop rotation                 | 4      | 48     | 0.68    | 0.6118 |
| Tillage*Crop rotation         | 20     | 48     | 2.46    | 0.0055 |

| Type 3 Tests of Fixed Effects |        |        |         |        |
|-------------------------------|--------|--------|---------|--------|
| Effect                        | Num DF | Den DF | F Value | Pr > F |
| Crop rotation                 | 4      | 60     | 0.44    | 0.7770 |
| block                         | 2      | 10     | 24.31   | 0.0001 |
| Crop rotation*block           | 8      | 60     | 0.49    | 0.8591 |

| Source              | DF | Sum of Squares | F Value | Pr > F |
|---------------------|----|----------------|---------|--------|
| Crop rotation       | 4  | 197.324643     | 0.44    | 0.7770 |
| block               | 2  | 3457.723388    | 24.31   | 0.0001 |
| Crop rotation*block | 8  | 435.884027     | 0.49    | 0.8591 |
| Tillage             | 5  | 4385.755701    | 12.34   | 0.0005 |
| Tillage*block       | 10 | 711.089100     | 0.64    | 0.7749 |
| Residual            | 60 | 6680.456384    | .       | .      |

**Aggregate associated C >2 mm (0-15 cm)**

| Type 3 Tests of Fixed Effects |        |        |         |        |
|-------------------------------|--------|--------|---------|--------|
| Effect                        | Num DF | Den DF | F Value | Pr > F |
| Tillage                       | 5      | 10     | 41.00   | <.0001 |
| Crop rotation                 | 4      | 48     | 6.27    | 0.0004 |
| Tillage*Crop rotation         | 20     | 48     | 2.33    | 0.0087 |

| Type 3 Tests of Fixed Effects |        |        |         |        |
|-------------------------------|--------|--------|---------|--------|
| Effect                        | Num DF | Den DF | F Value | Pr > F |
| Crop rotation                 | 4      | 60     | 4.20    | 0.0046 |
| block                         | 2      | 10     | 9.50    | 0.0049 |
| Crop rotation*block           | 8      | 60     | 0.42    | 0.9044 |

| Source        | DF | Sum of Squares | F Value | Pr > F |
|---------------|----|----------------|---------|--------|
| Crop rotation | 4  | 25.376465      | 4.20    | 0.0046 |

| Source              | DF | Sum of Squares | F Value | Pr > F |
|---------------------|----|----------------|---------|--------|
| block               | 2  | 18.821036      | 9.50    | 0.0049 |
| Crop rotation*block | 8  | 5.082058       | 0.42    | 0.9044 |
| Tillage             | 5  | 207.329353     | 41.84   | <.0001 |
| Tillage*block       | 10 | 9.910976       | 0.66    | 0.7602 |
| Residual            | 60 | 90.706306      | .       | .      |

**Aggregate associated C      2-0.5mm (0-15 cm)**

| Type 3 Tests of Fixed Effects |        |        |         |        |
|-------------------------------|--------|--------|---------|--------|
| Effect                        | Num DF | Den DF | F Value | Pr > F |
| Tillage                       | 5      | 10     | 15.11   | 0.0002 |
| Crop rotation                 | 4      | 48     | 5.15    | 0.0016 |
| Tillage*Crop rotation         | 20     | 48     | 2.15    | 0.0155 |

| Type 3 Tests of Fixed Effects |        |        |         |        |
|-------------------------------|--------|--------|---------|--------|
| Effect                        | Num DF | Den DF | F Value | Pr > F |
| Crop rotation                 | 4      | 60     | 4.07    | 0.0055 |
| block                         | 2      | 10     | 0.67    | 0.5350 |
| Crop rotation*block           | 8      | 60     | 1.49    | 0.1784 |

| Source              | DF | Sum of Squares | F Value | Pr > F |
|---------------------|----|----------------|---------|--------|
| Crop rotation       | 4  | 24.093471      | 4.07    | 0.0055 |
| block               | 2  | 2.245588       | 0.67    | 0.5350 |
| Crop rotation*block | 8  | 17.683017      | 1.49    | 0.1784 |
| Tillage             | 5  | 120.248238     | 14.27   | 0.0003 |
| Tillage*block       | 10 | 16.851743      | 1.14    | 0.3493 |
| Residual            | 60 | 88.748084      | .       | .      |

**Aggregate associated C      0.5-0.25 mm (0-15 cm)**

| Type 3 Tests of Fixed Effects |        |        |         |        |
|-------------------------------|--------|--------|---------|--------|
| Effect                        | Num DF | Den DF | F Value | Pr > F |
| Tillage                       | 5      | 10     | 15.56   | 0.0002 |
| Crop rotation                 | 4      | 48     | 2.78    | 0.0371 |
| Tillage*Crop rotation         | 20     | 48     | 1.49    | 0.1299 |

| Type 3 Tests of Fixed Effects |        |        |         |        |
|-------------------------------|--------|--------|---------|--------|
| Effect                        | Num DF | Den DF | F Value | Pr > F |
| Crop rotation                 | 4      | 60     | 2.43    | 0.0576 |
| block                         | 2      | 10     | 5.47    | 0.0248 |
| Crop rotation*block           | 8      | 60     | 1.23    | 0.2996 |

| Source              | DF | Sum of Squares | F Value | Pr > F |
|---------------------|----|----------------|---------|--------|
| Crop rotation       | 4  | 32.318475      | 2.43    | 0.0576 |
| block               | 2  | 24.690561      | 5.47    | 0.0248 |
| Crop rotation*block | 8  | 32.664998      | 1.23    | 0.2996 |
| Tillage             | 5  | 226.013446     | 20.03   | <.0001 |
| Tillage*block       | 10 | 22.562647      | 0.68    | 0.7406 |
| Residual            | 60 | 199.762764     | .       | .      |

**Aggregate associated C      0.25-0.125mm (0-15 cm)**

| Type 3 Tests of Fixed Effects |        |        |         |        |
|-------------------------------|--------|--------|---------|--------|
| Effect                        | Num DF | Den DF | F Value | Pr > F |
| Tillage                       | 5      | 10     | 16.57   | 0.0001 |
| Crop rotation                 | 4      | 48     | 9.22    | <.0001 |
| Tillage*Crop rotation         | 20     | 48     | 1.65    | 0.0783 |



| Type 3 Tests of Fixed Effects |        |        |         |        |
|-------------------------------|--------|--------|---------|--------|
| Effect                        | Num DF | Den DF | F Value | Pr > F |
| Crop rotation                 | 4      | 60     | 8.81    | <.0001 |
| block                         | 2      | 10     | 8.54    | 0.0069 |
| Crop rotation*block           | 8      | 60     | 2.19    | 0.0412 |

| Source              | DF | Sum of Squares | F Value | Pr > F |
|---------------------|----|----------------|---------|--------|
| Crop rotation       | 4  | 55.670515      | 8.81    | <.0001 |
| block               | 2  | 28.791569      | 8.54    | 0.0069 |
| Crop rotation*block | 8  | 27.618580      | 2.19    | 0.0412 |
| Tillage             | 5  | 139.618730     | 16.57   | 0.0001 |
| Tillage*block       | 10 | 16.848964      | 1.07    | 0.4017 |
| Residual            | 60 | 94.775825      | .       | .      |

**Aggregate associated C      0.125-0.053 mm (0-15 cm)**

| Type 3 Tests of Fixed Effects |        |        |         |        |
|-------------------------------|--------|--------|---------|--------|
| Effect                        | Num DF | Den DF | F Value | Pr > F |
| Tillage                       | 5      | 10     | 12.84   | 0.0004 |
| Crop rotation                 | 4      | 48     | 7.23    | 0.0001 |
| Tillage*Crop rotation         | 20     | 48     | 1.44    | 0.1502 |

| Type 3 Tests of Fixed Effects |        |        |         |        |
|-------------------------------|--------|--------|---------|--------|
| Effect                        | Num DF | Den DF | F Value | Pr > F |
| Crop rotation                 | 4      | 60     | 7.40    | <.0001 |
| block                         | 2      | 10     | 11.00   | 0.0030 |
| Crop rotation*block           | 8      | 60     | 2.69    | 0.0135 |

| Source        | DF | Sum of Squares | F Value | Pr > F |
|---------------|----|----------------|---------|--------|
| Crop rotation | 4  | 41.979365      | 7.40    | <.0001 |

| Source              | DF | Sum of Squares | F Value | Pr > F |
|---------------------|----|----------------|---------|--------|
| block               | 2  | 22.859689      | 11.00   | 0.0030 |
| Crop rotation*block | 8  | 30.516606      | 2.69    | 0.0135 |
| Tillage             | 5  | 93.177203      | 17.93   | 0.0001 |
| Tillage*block       | 10 | 10.395427      | 0.73    | 0.6907 |
| Residual            | 60 | 85.105574      | .       | .      |

**Aggregate associated C >2mm 15-30 cm**

| Type 3 Tests of Fixed Effects |        |        |         |        |
|-------------------------------|--------|--------|---------|--------|
| Effect                        | Num DF | Den DF | F Value | Pr > F |
| Tillage                       | 5      | 10     | 21.22   | <.0001 |
| Crop rotation                 | 4      | 48     | 5.76    | 0.0007 |
| Tillage*Crop rotation         | 20     | 48     | 9.32    | <.0001 |

| Type 3 Tests of Fixed Effects |        |        |         |        |
|-------------------------------|--------|--------|---------|--------|
| Effect                        | Num DF | Den DF | F Value | Pr > F |
| Crop rotation                 | 4      | 60     | 1.58    | 0.1919 |
| block                         | 2      | 10     | 17.31   | 0.0006 |
| Crop rotation*block           | 8      | 60     | 0.52    | 0.8375 |

| Source              | DF | Sum of Squares | F Value | Pr > F |
|---------------------|----|----------------|---------|--------|
| Crop rotation       | 4  | 13.455600      | 1.58    | 0.1919 |
| block               | 2  | 57.763372      | 17.31   | 0.0006 |
| Crop rotation*block | 8  | 8.854797       | 0.52    | 0.8375 |
| Tillage             | 5  | 177.003920     | 21.22   | <.0001 |
| Tillage*block       | 10 | 16.686438      | 0.78    | 0.6451 |
| Residual            | 60 | 127.933829     | .       | .      |

**Aggregate associated C 15-30 cm 2-0.5mm**

| Type 3 Tests of Fixed Effects |        |        |         |        |
|-------------------------------|--------|--------|---------|--------|
| Effect                        | Num DF | Den DF | F Value | Pr > F |
| Tillage                       | 5      | 10     | 16.59   | 0.0001 |
| Crop rotation                 | 4      | 48     | 2.41    | 0.0617 |
| Tillage*Crop rotation         | 20     | 48     | 1.29    | 0.2333 |

| Type 3 Tests of Fixed Effects |        |        |         |        |
|-------------------------------|--------|--------|---------|--------|
| Effect                        | Num DF | Den DF | F Value | Pr > F |
| Crop rotation                 | 4      | 60     | 2.01    | 0.1048 |
| block                         | 2      | 10     | 8.07    | 0.0082 |
| Crop rotation*block           | 8      | 60     | 0.20    | 0.9899 |

| Source              | DF | Sum of Squares | F Value | Pr > F |
|---------------------|----|----------------|---------|--------|
| Crop rotation       | 4  | 13.349340      | 2.01    | 0.1048 |
| block               | 2  | 21.707899      | 8.07    | 0.0082 |
| Crop rotation*block | 8  | 2.646952       | 0.20    | 0.9899 |
| Tillage             | 5  | 114.709602     | 17.07   | 0.0001 |
| Tillage*block       | 10 | 13.441458      | 0.81    | 0.6211 |
| Residual            | 60 | 99.721360      | .       | .      |

**Aggregate associated C 15-30 cm 0.5-0.25 mm**

| Type 3 Tests of Fixed Effects |        |        |         |        |
|-------------------------------|--------|--------|---------|--------|
| Effect                        | Num DF | Den DF | F Value | Pr > F |
| Tillage                       | 5      | 10     | 16.17   | 0.0002 |
| Crop rotation                 | 4      | 48     | 2.23    | 0.0800 |
| Tillage*Crop rotation         | 20     | 48     | 1.24    | 0.2628 |

| Type 3 Tests of Fixed Effects |        |        |         |        |
|-------------------------------|--------|--------|---------|--------|
| Effect                        | Num DF | Den DF | F Value | Pr > F |
| Crop rotation                 | 4      | 60     | 1.82    | 0.1377 |
| block                         | 2      | 10     | 30.84   | <.0001 |
| Crop rotation*block           | 8      | 60     | 0.48    | 0.8636 |

| Source              | DF | Sum of Squares | F Value | Pr > F |
|---------------------|----|----------------|---------|--------|
| Crop rotation       | 4  | 9.298001       | 1.82    | 0.1377 |
| block               | 2  | 29.183937      | 30.84   | <.0001 |
| Crop rotation*block | 8  | 4.946782       | 0.48    | 0.8636 |
| Tillage             | 5  | 84.371349      | 35.67   | <.0001 |
| Tillage*block       | 10 | 4.730814       | 0.37    | 0.9551 |
| Residual            | 60 | 76.829251      | .       | .      |

**Aggregate associated C 15-30 cm 0.25-0.125mm**

| Type 3 Tests of Fixed Effects |        |        |         |        |
|-------------------------------|--------|--------|---------|--------|
| Effect                        | Num DF | Den DF | F Value | Pr > F |
| Tillage                       | 5      | 10     | 3.74    | 0.0362 |
| Crop rotation                 | 4      | 48     | 0.82    | 0.5208 |
| Tillage*Crop rotation         | 20     | 48     | 0.53    | 0.9401 |

| Type 3 Tests of Fixed Effects |        |        |         |        |
|-------------------------------|--------|--------|---------|--------|
| Effect                        | Num DF | Den DF | F Value | Pr > F |
| Crop rotation                 | 4      | 60     | 1.05    | 0.3891 |
| block                         | 2      | 10     | 8.61    | 0.0067 |
| Crop rotation*block           | 8      | 60     | 1.91    | 0.0751 |

| Source        | DF | Sum of Squares | F Value | Pr > F |
|---------------|----|----------------|---------|--------|
| Crop rotation | 4  | 4.201713       | 1.05    | 0.3891 |

| Source              | DF | Sum of Squares | F Value | Pr > F |
|---------------------|----|----------------|---------|--------|
| block               | 2  | 37.047593      | 8.61    | 0.0067 |
| Crop rotation*block | 8  | 15.275041      | 1.91    | 0.0751 |
| Tillage             | 5  | 40.177725      | 3.74    | 0.0362 |
| Tillage*block       | 10 | 21.507955      | 2.15    | 0.0338 |
| Residual            | 60 | 60.011681      | .       | .      |

**Aggregate associated C 15-30 cm 0.125-0.053mm**

| Type 3 Tests of Fixed Effects |        |        |         |        |
|-------------------------------|--------|--------|---------|--------|
| Effect                        | Num DF | Den DF | F Value | Pr > F |
| Tillage                       | 5      | 10     | 3.62    | 0.0394 |
| Crop rotation                 | 4      | 48     | 3.98    | 0.0072 |
| Tillage*Crop rotation         | 20     | 48     | 0.46    | 0.9704 |

| Type 3 Tests of Fixed Effects |        |        |         |        |
|-------------------------------|--------|--------|---------|--------|
| Effect                        | Num DF | Den DF | F Value | Pr > F |
| Crop rotation                 | 4      | 60     | 5.09    | 0.0013 |
| block                         | 2      | 10     | 3.58    | 0.0671 |
| Crop rotation*block           | 8      | 60     | 1.64    | 0.1333 |

| Source              | DF | Sum of Squares | F Value | Pr > F |
|---------------------|----|----------------|---------|--------|
| Crop rotation       | 4  | 22.805590      | 5.09    | 0.0013 |
| block               | 2  | 20.530660      | 3.58    | 0.0671 |
| Crop rotation*block | 8  | 14.658627      | 1.64    | 0.1333 |
| Tillage             | 5  | 51.911070      | 3.62    | 0.0394 |
| Tillage*block       | 10 | 28.647389      | 2.56    | 0.0120 |
| Residual            | 60 | 67.147386      | .       | .      |
